# Supplementary material
Source: MDPI journal article supplement (https://www.mdpi.com/2073-4395/11/10/1947)
Supplement: s1 [file s1]

### Supplementary figures and tables

**Table S1. Important dates associated to phenology of bloom and color of the fruits during season 2017.** The phenology was estimated considering the state of the whole tree using the four replicates. DAFB: days after full bloom.

| Cultivar        | Phenology          | Date                 | DAFB |
|-----------------|--------------------|----------------------|------|
| 'Glenred'       | Full bloom         | September 11th, 2017 | 0    |
|                 | 10%-15% Pink blush | October 23rd, 2017   | 43   |
|                 | Harvest            | November 9th, 2017   | 59   |
| 'Lapins'        | Full bloom         | September 21st, 2017 | 0    |
|                 | 10% Pink blush     | November 16th, 2017  | 56   |
|                 | Harvest            | November 29th, 2017  | 69   |
| 'Bing'          | Full bloom         | September 21st, 2017 | 0    |
|                 | 20% Pink blush     | November 17th, 2017  | 57   |
|                 | Harvest            | November 30th, 2017  | 70   |
| 'Royal Rainier' | Full bloom         | September 14th, 2017 | 0    |
|                 | 10% Pink blush     | October 30th, 2017   | 46   |
|                 | Harvest            | November 23rd, 2017  | 70   |

**Table S2. Important dates associated to phenology of bloom and color of the fruits during season 2018.** The phenology was estimated considering the state of the whole tree using the four replicates. DAFB: days after full bloom. DAFB: days after full bloom.

| Cultivar  | Treatment               | Phenology            | Date                 | DAFB |
|-----------|-------------------------|----------------------|----------------------|------|
| 'Glenred' | ABA (canopy spraying)   | Full bloom           | September 12th, 2018 | 0    |
|           |                         | 15% Pink blush       | October 23rd, 2018   | 41   |
|           |                         | Harvest              | November 9th, 2018   | 58   |
|           | NDGA (canopy spraying)  | Full bloom           | September 10th, 2018 | 0    |
|           |                         | 10% - 15% Pink blush | October 23rd, 2018   | 43   |
|           |                         | Harvest              | November 9th, 2018   | 60   |
| 'Lapins'  | ABA (canopy spraying)   | Full bloom           | September 17th, 2018 | 0    |
|           |                         | 25% Pink blush       | November 14th, 2018  | 58   |
|           |                         | Harvest              | November 30th, 2018  | 74   |
|           | NDGA (canopy spraying)  | Full bloom           | September 18th, 2018 | 0    |
|           |                         | 20% - 25% Pink blush | November 14th, 2018  | 57   |
|           |                         | Harvest              | November 30th, 2018  | 73   |
| 'Lapins'  | ABA ("on tree" dipping) | Full bloom           | September 17th, 2018 | 0    |
|           |                         | 25% Pink blush       | November 14th, 2018  | 58   |
|           |                         | Harvest              | November 30th, 2018  | 74   |

**Table S3. Important dates associated to phenology of bloom and color of the fruits during season 2019.** The phenology was estimated considering the state of the whole tree using the four replicates. DAFB: days after full bloom. DAFB: days after full bloom.

| Cultivar | Treatment               | Phenology            | Date                 | DAFB |
|----------|-------------------------|----------------------|----------------------|------|
|          |                         | Full bloom           | September 12th, 2019 | 0    |
| ‘Lapins’ | ABA ("on tree" dipping) | 25% - 35% Pink blush | November 4th, 2019   | 53   |
|          |                         | Harvest              | November 27th, 2019  | 76   |

**Table S4. Phenotypical differences between the cultivars analyzed in this work.** The four cultivars selected differed in the phenotypic characteristic's ‘color’, ‘blooming time’ and ‘maturity time’.

| Cultivar        | Color at harvest | Blooming Time  | Maturity Time  | Reference                                                                                             |
|-----------------|------------------|----------------|----------------|-------------------------------------------------------------------------------------------------------|
| ‘Glenred’       | Dark Red         | Early-blooming | Early-maturing | <a href="http://www.bradfordgenetics.com/glenred.htm">http://www.bradfordgenetics.com/glenred.htm</a> |
| ‘Lapins’        | Mahogany         | Early-blooming | Mid-maturing   | Rodrigo and Guerra <sup>44</sup>                                                                      |
| ‘Bing’          | Mahogany         | Mid-blooming   | Mid-maturing   | Rodrigo and Guerra <sup>44</sup>                                                                      |
| ‘Royal Rainier’ | Bicolor          | Early-blooming | Mid-maturing   | Rodrigo and Guerra <sup>44</sup>                                                                      |
